# Supplementary material for: Morphological and Transcriptomic Analysis of a Beetle Chemosensory System Reveals a Gnathal Olfactory Center
Source: Springer Nature journal article supplement (doi:10.1186/s12915-016-0304-z), 2016-10-17

A

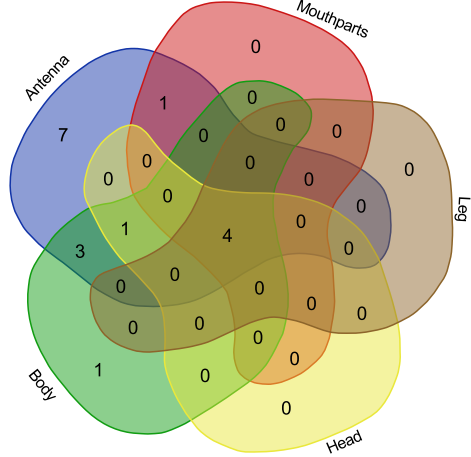

B

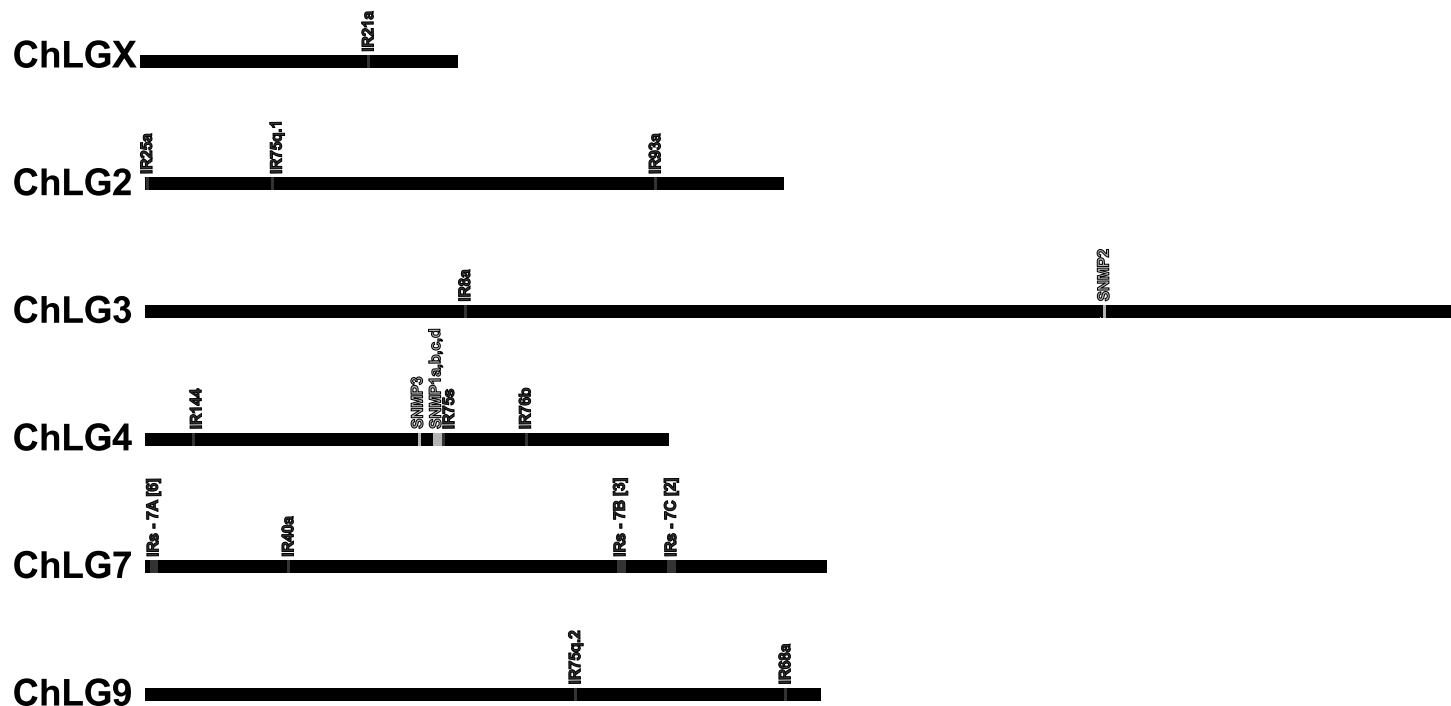

Supplement: 12915_2016_304_MOESM9_ESM.pdf [file 12915_2016_304_MOESM9_ESM.pdf]
