# Supplementary material for: Morphological and Transcriptomic Analysis of a Beetle Chemosensory System Reveals a Gnathal Olfactory Center
Source: Springer Nature journal article supplement (doi:10.1186/s12915-016-0304-z), 2016-10-17
Supplement: 12915_2016_304_MOESM16_ESM.pdf [file 12915_2016_304_MOESM16_ESM.pdf]

Primer:

Gal4deltafor: TATGGATCCACCTGCGCTGATGAAGCTACTGTCTTCTATCGAACAAG

SV40rev: GGTCCATGGGATGAGTTTGGACAAACCACAACACTAG

TcOR1upfor: TAGGGATCCTTAAATTATAAAAACAATTGACGAAAAATAGCCTCGTC

TcOR1uprev: AGTACCTGCTTCATCATCTGGAAGTTGGTTAGAATTTGGTATTG

T7: gaattgtaatacgaactcactatagg

T7-SP6: taatacgaactcactataggatttaggtgacactataga

TcasOrco3UTRrev: TTAGGGTAAACTTTTATTAGGTAAAATAGAAGTAACTAAGTC

TcasOrco3for: GCGTTAGCCCAAGTGTTTC

>TcasOrco

ATGATGAAATTCAAGGTCACGGGCTCGTGGCCGACCTTATGCCCAACATTCGGCTCATCCAAGCGTC  
CGGGCACTTCATGCTCAACTACCATGCCGATAAATCCGGCGCCTTGCACACCCTCAGGCTCGGCTACT  
GCTGCATGCACCTGGTGTTCGTCCCTAGTCCAATATGGTTGTAATTTTCGTTAATTTGGTACTGGAACGT  
GGTGACGTCAACGATTTGGCTGCCAACCCATCACGGTGCTGTTTTTCACGCATTGTGTACGAAATT  
CGTGTATTTTCGCGGTCAGGTCGAAACTTTTCTACCGAACTTTAGGTATTTGGAACCAACCAAACAGTC  
ATCCGTTGTTTGTGAGTCGAATAATCGCTACCACGGCATTGCTTTGAAAAAATGCGGGCCTTGCTC  
TATATTATAATCATCTGGACGTCTTCAGTGCTATTGCTTGGACCGGTATCACGTTTCGTGGGTGATAG  
CGTCCACAATATCAAGGACCCAGAAAACGAAAATTTGACCATCACTGAACCCATCCACGCTTGTTGG  
TCAAGGCATGGTACCCATGGGACGCCATGAGCGGCATGCCCTACTACATAACCCTCGTGTCCAAATC  
TACTACGTTTTTTTTCTCACTCGCGCACGCAAACCTCCTCGATAGCCTCTTCTGTTTCGTGGCTGATTTT  
CGCCTGCGAGCAGTTGCAACACTTGAAGAGATCATGAAGCCTTTGATGGAACTTTCGGCAACTCTGG  
ACACCTACGTGCCGAAGAGTGCCGACTTGTTCCGAGCGCCGAGCGCCACCTCGCAGGACCAACTCATC  
GAAAATGATTACAATGAGAAAACGAGGATCTTAAGGGGGTGTATAGCACGCGCCAGGAGCTCGGCGG  
CCATTTTAGGGGCGGGGCGTTGCAGAATTTCCGGTAGTGGGGGCGTTGGGCCGAACGGTTTGACCAAAA  
AACAGGAGTTGATGGTCAGGTCCGGCATCAAATACTGGGTGGAGCGCCACAAACACGTCGTCAGGTTG  
GTCACGGCCATCGGTGATGCGTATGGTGTGGCACTCCTGCTCCATATGCTGACGTCTACGATCATGTT  
GACGCTTTTGGCCTATCAGGCTACGAAAATCACAGGGGTGGACAAATACGCAGCTACGGTTCGGGCT  
ATTTGCTGTTTTGCGTTAGCCCAAGTGTTTCATTTTTTGTATTTTTGGCAACCGCCTCATTGAGGAGAGC  
TCTTCGGTGATGGAGGCGGCCTATAGTTGCCATTGGTACGACGGGTCGGAGGAGGCTAAGACTTTTGT  
ACAGATCGTCTGCCAACAATGTCAGAAGGCTATGTCCATTTCCGGTGCTAAATTCCTTACGATTTTCGT  
TAGATCTGTTTCGCTTCGGTACTGGGCGCTGTGGTGACCTACTTCATGGTGTGGTGCAACTCAAATGA  
GGGTTTTTCGTTGCGTACGGTTGGTAGTTCCCTAATTTCTGCACGTGACGTTTTGAAAATTGTGATAATTAGACGGCACTGATTTTTCAAGTT  
ACACAGCATTCATAAGTGTCTTAATTCAGATGGCGAGTACCTGATAATGGCGGTGACAAGGGGAAATAATAACGCTCTAGACTTAGTTACTTC  
TATTTTACCTAATAAAGTTTACCCTAACTA

Plasmids:

>CH#757: pSLfa\_p-Gal4delta-SV40, UASp-lacZ-K10\_fa

CTAGAGTCGACGGTACCGGGCCCAATTCCTCGGGGATCGAAAGAGGCTGCTAAAGCAAAAAAGAAGTCACCATGT  
CGTTTTACTTTGACCAACAAGAACGTGATTTTTCGTTGCCGGTCTGGGAGGCATTGGTCTGGACACCAGCAAGGAGC  
TGCTCAAGCGCGATCCCGTCGTTTTACAACGTCGTGAGTGGGAAAACCTGGCGTTACCCAACTTAATCGCCTTG

CAGCACATCCCCCTTTCGCCAGCTGGCGTAATAGCGAAGAGGCCCGCACCGATCGCCCTTCCCAACAGTTGCGCA  
GCCTGAATGGCGAATGGCGCTTTGCCTGGTTTTCCGGCACAGAAAGCGGTGCCGAAAGCTGGCTGGAGTGCATC  
TTCCTGAGGCCGATACTGTGCTGCTCCCCTCAAACCTGGCAGATGCACGGTTACGATGCGCCCATCTACACCAACG  
TAACCTATCCCATTACGGTCAATCCGCCGTTTTGTTCCCACGGAGAATCCGACGGGTTGTTACTCGCTCACATTTA  
ATGTTGATGAAAGCTGGCTACAGGAAGGCCAGACGCGAATTATTTTTGATGGCGTTAACTCGGGCTTTCATCTGT  
GGTGCAACGGGCGCTGGGTTCGGTTACGGCCAGGACAGTCGTTTTGCCGTCTGAATTTGACCTGAGCGCATTTTTAC  
GCGCCGGAGAAAACCGCCTCGCGGTGATGGTGCTGCGTTGGAGTGACGGCAGTTATCTGGAAGATCAGGATATGT  
GGCGGATGAGCGGCATTTTCCGTGACGTCTCGTTGCTGCATAAACCGACTACACAAATCAGCGATTTCCATGTTG  
CCACTCGCTTTAATGATGATTTTCCGCGCGCTGTACTGGAGGCTGAAGTTCAGATGTGCGGCGAGTTGCGTGACT  
ACCTACGGGTAACAGTTTTCTTTATGGCAGGGTGAACCGCAGGTGCCAGCGGCACCGCGCCTTTCGGCGGTGAAA  
TTATCGATGAGCGTGGTGGTTATGCCGATCGCGTACACTACGTCTGAACGTGAAAACCCGAAACTGTGGAGCG  
CCGAAATCCCGAATCTCTATCGTGCGGTGGTTGAACTGCACACCGCCGACGGCACGCTGATTGAAGCAGAAGCCT  
GCGATGTCGGTTTTCCGCGAGGTGCGGATTGAAAATGGTCTGCTGCTGCTGAACGGCAAGCCGTTGCTGATTCGAG  
GCGTTAACCGTCACGAGCATCATCCTCTGCATGGTCAGGTTCATGGATGAGCAGACGATGGTGCAGGATATCCTGC  
TGATGAAGCAGAACAACCTTTAACGCCGTGCGCTGTTTCGATTATCCGAACCATCCGCTGTGGTACACGCTGTGCG  
ACCGCTACGGCCTGTATGTGGTGGATGAAGCCAATATTGAAACCCACGGCATGGTGCCAATGAATCGTCTGACCG  
ATGATCCGCGCTGGCTACCGGCGATGAGCGAACCGTAACCGAATGGTGCAGCGCGATCGTAATCACCAGAGTG  
TGATCATCTGGTTCGCTGGGGAATGAATCAGGCCACGGCGCTAATCAGCAGCGCTGTATCGCTGGATCAAATCTG  
TCGATCCTTCCCGCCCGGTGCAGTATGAAGGCGGGGAGCCGACACCACGGCCACCGATATTATTTGCCGATGT  
ACGCGCGCGTGGATGAAGACCAGCCCTTCCCGGCTGTGCCGAAATGGTCCATCAAAAAATGGCTTTCGCTACCTG  
GAGAGACGCGCCCGCTGATCCTTTGCGAATACGCCACGCGATGGGTAAACAGTCTTGGCGGTTTTGCTAAATACT  
GGCAGGCGTTTTGCTCAGTATCCCGTTTTACAGGGCGGCTTCGTCTGGGACTGGGTGGATCAGTCGCTGATTAAT  
ATGATGAAAACGGCAACCCGTGGTTCGGCTTACGGCGGTGATTTTGGCGATACGCCGAACGATCGCCAGTTCTGTA  
TGAACGGTCTGGTCTTTGCCGACCGCACGCCGATCCAGCGCTGACGGAAGCAAAAACACCAGCAGCAGTTTTTCC  
AGTTCCGTTTTATCCGGGCAAACCATCGAAGTGACCAGCGAATACCTGTTCCGTCATAGCGATAACGAGCTCCTGC  
ACTGGATGGTGGCGCTGGATGGTAAGCCGCTGGCAAGCGGTGAAGTGCCTCTGGATGTCGCTCCACAAGGTAAC  
AGTTGATTGAACTGCCTGAACTACCGCAGCCGGAGAGCGCCGGGCAACTCTGGCTCACAGTACGCGTAGTGCAAC  
CGAACGCGACCGCATGGTTCAGAAGCCGGGCACATCAGCGCCTGGCAGCAGTGGCGTCTGGCGGAAAAACCTCAGTG  
TGACGCTCCCCGCGCGTCCACGCCATCCCGCATCTGACCACCAGCGAAATGGATTTTTGTCATCGAGCTGGGTA  
ATAAGCGTTGGCAATTTAACCGCCAGTCAGGCTTTCTTTACAGATGTGGATTGGCGATAAAAAACAACCTGCTGA  
CGCCGCTGCGCGATCAGTTACCCCGTGCACCGCTGGATAACGACATTGGCGTAAGTGAAGCGACCCGCATTGACC  
CTAACGCCTGGGTGCAACGCTGGAAGGCGGCGGGCCATTACCAGGCCGAAGCAGCGTGTGTCAGTGCACGGCAG  
ATACACTTGCTGATGCGGTGCTGATTACGACCGCTCACGCGTGGCAGCATCAGGGGAAAAACCTTATTTATCAGCC  
GGAAAACCTACCGGATTGATGGTAGTGGTCAAATGGCGATTACCGTTGATGTTGAAGTGGCGAGCGGATACACCGC  
ATCCGGCGCGGATTGGCCTGAACTGCCAGCTGGCGCAGGTAGCAGAGCGGGTAAACTGGCTCGGATTAGGGCCGC  
AAGAAAACCTATCCCGACCGCCTTACTGCCGCTGTTTTGACCGCTGGGATCTGCCATTGTCAGACATGTATACCC  
CGTACGTCTTCCCGAGCGAAAACGGTCTGCGCTGCGGGACGCGCGAATTGAATTATGGCCACACCAGTGGCGCG  
GCGACTTCCAGTTCAACATCAGCCGCTACAGTCAACAGCAACTGATGGAAACAGCCATCGCCATCTGCTGCACG  
CGGAAGAAGGCACATGGCTGAATATCGACGTTTTCCATATGGGGATTGGTGGCGACGACTCTGGAGCCCGTCAG  
TATCGGCGGACCAGCTGAGCGCCGGTTCGCTACCATTACCAGTTGGTCTGGTGTCAAAAAATAATAAACGGGCA  
GGCCATGTCTGCCCGTATTTTCGCGTAAGGAAATCCATTATGTAATTTTTAAAAAACACAACTTTTTGGATGTTTCG  
GTTTTATTCTTTTTCTTTTTACTTTTTTATCATGGGAGCCTACTTCCCGTTTTTCCCGATTTGGCTACATGACATCA  
ACCATATCAGCAAAAGTGATACGGGTATTATTTTTGCGCTATTTCTCTGTTCTCGCTATTATTTCCAACCGCTGT  
TTGGTCTGCTTTCTGACAAACTCGACTCTAGGGCCGCTGCAGCTGGCGCCATCGATACGGTTCGACCGTACGTCG  
CGACCGCGGACATGTACAGAGCTCGAGAAGTACTAGAATTATACCTAAACCCATGGTCAAGAGTAAACATTTCTG  
CCTTTGAAGTTGAGAACAATTAAGCATCCCCTGGTTAAACCTGACACTTCATACTTGTTAATAGCGCCATAAA  
CATAGCACAATTTGCAAGAAATCAGTTAAAAGCAATTAGCAATTAGCAATAACTCTGCTGACTTCAA  
AACGAGAAGAGTTGCAAGTATTTGTAAGGCACAGTTTATAGACCACCGACGGCTCATTAGGGCTCGTCATGTAAC  
TAAGCGCGGTGAAACCCAATTGAACAGTAGTAGGTGGAATTAGTTAGTTAGTCAATGGGGAAGATTTAACCTCA  
GGTAGCAAAGTAATTGAACTGCGGGCAGAGAGTCTTAAGACTAAATAATATATTTAAAAATCTGGCCCTTTGACC  
TTGCTTGTGAGGTGCATTTGGGTTCAATCGTAAGTTGCTTCTATATAAAACTTTCCCATCCCCGCAATAATGA  
AGAATACCGCAGAATAAAGAGAGATTTGCAACAAAAATAAAGGCATTGCGAAAACTTTTTATGGGGGATCATTA  
CACTCGGGCCTACGGTTACAATTTCCAGCCACTTAAGCGACAAGTTGGCCAACAATCCATCTAATAGCTAATAG  
CGCAATCACTGGTAATCGCAAGAGTATATAGGGCAATAGAACCATGGATTTGACCAAAGGTAACCGAGACAATG

GAGAAGCAAGAGGATTTCAAACCTGAACACCCACAGTGTGTACTACCACTGGCGCGTTTGGAGCTCACTGGCC  
TGATGCGCTCCTCCGGGCGTTTTCAAGCCTGCTTTACGTGGTATACTCCATTACGGTCAAGTTGGTGGTCACCGTG  
CTGTTTTCCCTTGAGCTTGCTGGCCAGGCTGCTGTTACACCACCAACATGGCCGGATTGTGCGAGAACCTGACCATA  
AGTATTACCGATATTGTGGCCAATTTGAAGTTTGCGAATGTGTACATGGTGAGGAAGCAGCTCCATGAGATTCGC  
TCTCTCCTAAGGCTCATGGACGCTAGAGCCCGGCTGGTGGGCGATCCCCGAGGAGATTTCTGCCTTGAGGAAGGAA  
GTGAATATCGGCACAGGGCACTTTCCAGCACCTTTGGCCAGTATTTTCGTATTTGGCACTACTTTGAGTTCGCGT  
CCGCGTGGTTCGTTCCCGCGATCGAGAGCTCCTGTATCCGGCCTGGTTCGGCGTTGACTGGATTCACTCCACCAG  
AAACTATGTGCTCATCAATATCTACCAGCTCTTCGGCTTGATAGTGCAGGCTATACAGAACTGCGCTAGTGA  
CTATCCGCCTGCGTTTTCTCTGCCTGCTCACGGGTCATATGCGTGTCTTTGGAGCTGAGGGTTCGGCGGATTGGCTG  
CACTGCAGCTGGCGCCATCGATACGCGTACGTGCGGACCGCGGACATGTACAGAGCTCGAGAAGTACTAGTGGCC  
ACGTGGGCGTGCACCTTAAGCTTGGCGCGCCTAGGCCGGCCAGCTTGGCACTGGCCGTCGTTTTACAACGTCGT  
GACTGGGAAAACCTGGCGTTACCCAACCTTAATCGCCTTGACAGCACATCCCCCTTTCGCCAGCTGGCGTAATAGC  
GAAGAGGCCCCGACCGATCGCCCTTCCCAACAGTTGCGCAGCCTGAATGGCGAATGGCGCCTGATGCGGTATTTT  
CTCCTTACGCATCTGTGCGGTATTTTACACCCGATACGTCAAAGCAACCATAGTACGCGCCCTGTAGCGGCGCAT  
TAAGCGCGGCGGGTGTGGTGGTTACGCGCAGCGTGACCGCTACACTTGCCAGCGCCCTAGCGCCCGCTCCTTTTCG  
CTTTCTTCCCTTCTTTCTCGCCACGTTTCGCCGGCTTTCCCGTCAAGCTCTAAATCGGGGGCTCCCTTTAGGGT  
TCCGATTTAGTGCTTTACGGCACCTCGACCCCAAAAACTTGATTTGGGTGATGGTTTACGTAGTGGGCCATCGC  
CCTGATAGACGGTTTTTTCGCCCTTTGACGTTGGAGTCCACGTTCTTTAATAGTGGACTCTTGTTCCAAACCTGGAA  
CAACACTCAACCCTATCTCGGGCTATTCTTTTGTATTTATAAGGGATTTTGCCGATTTCCGCCCTATTGGTTAAAA  
ATGAGCTGATTTAACAAAAATTTAACGCGAATTTTAAACAAAATATTAACGTTTACAATTTTATGGTGCACCTCTCA  
GTACAATCTGCTCTGATGCCGCATAGTTAAGCCAGCCCCGACACCCGCCAACACCCGCTGACGCGCCCTGACGGG  
CTTGTCTGCTCCCGGCATCCGCTTACAGACAAGCTGTGACCGTCTCCGGGAGCTGCATGTGTGAGAGGTTTTTAC  
CGTCATCACCGAAACGCGCGAGACGAAAGGGCCTCGTGATACGCCTATTTTATAGGTTAATGTCATGATAATAA  
TGTTTTCTTAGACGTCAGGTGGCACTTTTTCGGGGAAATGTGCGCGGAACCCCTATTTGTTTATTTTTCTAAATAC  
ATTCAAATATGTATCCGCTCATGAGACAATAACCCTGATAAATGCTTCAATAATATTGAAAAAGGAAGATATGA  
GTATTCAACATTTCCGTGTGCGCCCTTATTCCCTTTTTTTCGGCATTTTTGCCTTCTGTTTTTTGTCTACCCAGAAA  
CGCTGGTGAAGTAAAAGATGCTGAAGATCAGTTGGGTGCACGAGTGGGTACATCGAACTGGATCTCAACAGCG  
GTAAGATCCTTGAGAGTTTTTCGCCCGAAGAACGTTTTTCCAATGATGAGCACTTTTAAAGTTCTGCTATGTGGCG  
CGGTATTATCCCGTATTGACGCCGGGCAAGAGCAACTCGGTGCGCCGATACACTATTCTCAGAATGACTTGGTTG  
AGTACTCACAGTACAGAAAAGCATCTTACGGATGGCATGACAGTAAGAGAATTATGCAGTGTGCCATAACCA  
TGAGTGATAAAGTGCAGGCAACTTACTTCTGACAACGATCGGAGGACCGAAGGAGCTAACCGCTTTTTTGCACA  
ACATGGGGGATCATGTAACCTCGCCTTGATCGTTGGGAACCGGAGCTGAATGAAGCCATACCAAACGACGAGCGTG  
ACACCACGATGCCTGTAGCAATGGCAACAACGTTGCGCAAACCTATTAACCTGGCGAACTACTTACTCTAGCTTCCC  
GGCAACAATTAATAGACTGGATGGAGGCGGATAAAGTTGCAGGACCACTTCTGCGCTCGGCCCTTCCGGCTGGCT  
GGTTTTATTGCTGATAAATCTGGAGCCGGTGAGCGTGGGTCTCGCGGTATCATTGCAGCACTGGGGCCAGATGGTA  
AGCCCTCCCGTATCGTAGTTATCTACACGACGGGGAGTCAGGCAACTATGGATGAACGAAATAGACAGATCGCTG  
AGATAGGTGCCTCACTGATTAAGCATTGGTAACCTGTGACACCAAGTTTACTCATATATACTTTAGATTGATTTAA  
AACTTCATTTTTAATTTAAAAGGATCTAGGTGAAGATCCTTTTTTGATAATCTCATGACCAAAATCCCTTAACGTG  
AGTTTTCGTTCCACTGAGCGTCAGACCCCGTAGAAAAGATCAAAGGATCTTCTTGTAGATCCTTTTTTTCTGCGCG  
TAATCTGCTGCTTGCAAACAAAAAACACCGCTACCAGCGGTGGTTTTGTTTGGCCGATCAAGAGCTACCAACTC  
TTTTTCCGAAGGTAACCTGGCTTTCAGCAGAGCGCAGATACCAAATACTGTTCTTCTAGTGTAGCCGTAGTTAGGCC  
ACCCTTCAAGAACTCTGTAGCACCGCCTACATACCTCGCTCTGCTAATCCTGTTACCAGTGGCTGCTGCCAGTG  
GCGATAAGTCGTGTCTTACC GGTTGGACTCAAGACGATAGTTACC GGATAAGGCGCAGCGGTCCGGCTGAACGG  
GGGGTTCGTGCACACAGCCCAGCTTGGAGCGAACGACCTACACCGAACTGAGATACCTACAGCGTGAGCTATGAG  
AAAGCGCCACGCTTCCCGAAGGGGAGAAAGGCGGACAGGTATCCGGTAAGCGGCAGGGTCCGAAACAGGAGAGCGCA  
CGAGGGAGCTTCCAGGGGGAAACGCCTGGTATCTTTATAGTCTGTCCGGTTTTCCGCCACCTCTGACTTGAGCGTC  
GATTTTTGTGATGCTCGTCAGGGGGGGCGGAGCCTATGGAAAAACGCCAGCAACCGCGCCTTTTTTACGGTTCCCTGG  
CCTTTTTGCTGGCCTTTTTGCTCACATGTTCTTTCTGCGTTATCCCTGATTCTGTGGATAACCGTATTACC GGCT  
TTGAGTGAGCTGATAACCGCTCGCCGACCGCAACGACCGAGCGCAGCGAGTCACTGAGCGAGGAAGCGGAAGAGC  
GCCAATACGCAAACCGCCTCTCCCCGCGCTTGGCCGATTCAATTAATGCAGCTGGCACGACAGGTTTCCCGACT  
GGAAAGCGGGCAGTGAAGCGCAACGCAATTAATGTGAGTTAGCTCACTCATTAGGCACCCAGGCTTTACACTTTA  
TGCTTCCGGCTCGTATGTTGTGTGGAATTTGTGAGCGGATAACAATTTTACACAGGAAAACGCTATGACCATGATT  
ACGAATTGGCGCGCCTAGGCCGGCCGAATTCGAATGGCCATGGGACGTCGAGTCGATAGCCGAAGCTTACC GAAG  
TATACACTTAAATTCAGTGCACGTTTGCTTGGTTGAGAGGAAAGGTTGTGTGCGGACGAATTTTTTTTTGAAAAC

GGTGATAGAGCCTGAACCAGAAAAGATAAAAAGAAGGCTATAACCAGTGGGAGTACACAAACAGAGTAAGTTTGAAT  
AGTAAAAAAAATCATTTATGTAAACAATAACGTGACTGTGCGTTAGGTCCTGTTTCATTGGTACCNNNNNNNNNN  
NNNNNNNNNNNNNNNNNNATGAAGCTACTGTCTTCTATCGAACAAGCATGCGATATTTGCCGACTTAAAAAGCTCAA  
GTGCTCCAAAGAAAAACCGAAGTGCGCCAAGTGTCTGAAGAACAACCTGGGAGTGTGCTACTCTCCCAAAACCAA  
AAGGTCTCCGCTGACTAGGGCACATCTGACAGAAGTGAATCAAGGCTAGAAAAGACTGGAACAGCTATTTCTACT  
GATTTTTTCTCGAGAAGACCTTGACATGATTTTGAAAATGGATTCTTTACAGGATATAAAAAGCATTGTTAACAGG  
ATTATTTGTACAAGATAATGTGAATAAAGATGCCGTCACAGATAGATTGGCTTCAGTGGAGACTGATATGCCTCT  
AACATTGAGACAGCATAGAATAAGTGCACATCATCATCGGAAGAGAGTAGTAACAAAGGTCAAAGACAGTTGAC  
TGTATCGATTGAATTCCTCGGCAGCTCATCATGATAACTCCACAATTCCGTTGGATTTTATGCCAGGGATGCTC  
TTCATGGATTTGATTGGTCTGAAGAGGATGACATGTGCGGATGGCTTGCCCTTCTGAAAACGGACCCCAACAATA  
ATGGGTTCTTTGGCGACGGTTCTCTTATGTATTCTTCGATCTATTGGCTTTAAACCGGAAAAATTACACGAACT  
CTAACGTTAACAGGCTCCCGACCATGATTACGGATAGATACACGTTGGCTTCTAAGATCCACAACATCCCGTTTA  
CTTCAAAGTTATCTCAATAATTTTCAACCCCTACTGCCCTATCGTGCCTCACCAGCCTAATGATGTTGTATAAT  
AACCAGATTGAAATCGCGTCGAAGGATCAATGGCAAATCCTTTTTAACTGCATATTAGCCATTGGAGCCTGGTGT  
ATAGAGGGGAATCTACTGATATAGATGTTTTTTACTATCAAAATGCTAAATCTCATTGACGAGCAAGGTCTTC  
GAGTCAGGTTCCATAATTTTGGTGACAGCCCTACATCTTCTGTGCGGATATACACAGTGGAGGCAGAAAACAAAT  
ACTAGCTATAATTTTACAGCTTTTCCATANNNNNNNNAAGCTTNGTGCACNNGGTACCGCGCCAATTTCGAATG  
GCCATGGGCCGCGACTCTAGATCATAATCAGCCATAACCACATTTGTAGAGGTTTTACTTGTCTTTAAAAAACCTCC  
CACACCTCCCCCTGAACCTGAAACATAAAAATGAATGCAATTGTTGTTGTTAACTGTTTATTGCAGCTTATAATG  
GTTACAAATAAAGCAATAGCATCACAAATTTACAAATAAAGCATTTTTTTACTGCATTCTAGTTGTGGTTTGT  
CCAAACTCATCAATGTATCTTAACATGGGACGTCGAGGCCGCTCTAGCCCCCTCGAATGTTCTCTCTCTCTC  
TTCTCTCTCTCTTTCTCGAATGTTCTCTCTCTCTCTCTCTCTCTCTCTCTCTCTCTCTCGAGGTCATCAAGCTTAGGCCTC  
CAAGGCGGAGTACTGTCTCCGGGCTGGCGGAGTACTGTCTCCGGCAAGGCGGAGTACTGTCTCCGGGCTGGC  
GGAGTACTGTCTCCGGCAAGGCGGAGTACTGTCTCCGGGCTGGCGGAGTACTGTCTCCGGCAAGGCGGAGTA  
CTGTCTCCGGGCTGGCGGAGTACTGTCTCCGGCAAGGCGGAGTACTGTCTCCGGGCTGGCGGAGTACTGTCTC  
TCCGGCAAGGCGGAGTACTGTCTCCGGGCTGGCGGAGTACTGTCTCCGGCAAGGCGGAGTACTGTCTCCGGG  
CTGGCGGAGTACTGTCTCCGGCAAGGGTCGAGTCGATAGCCGAAGCTTACCGAAGTATACACTTAAATTCAGTG  
CACGTTTGCTTGTGAGAGGAAAGGTTGTGTGCGGACGAATTTTTTTTTGAAAACCGGTGATAGAGCCTGAACCA  
GAAAAGATAAAAAGAAGGCTATAACCAGTGGGAGTACACAAACAGAGTAAGTTTGAATAGTAAAAAAAATCATTTAT  
GTAAACAATAACGTGACTGTGCGTTAGGTCCTGTTTCATTGGTAC
