# Supplementary material for: Morphological and Transcriptomic Analysis of a Beetle Chemosensory System Reveals a Gnathal Olfactory Center
Source: Springer Nature journal article supplement (doi:10.1186/s12915-016-0304-z), 2016-10-17
Supplement: 12915_2016_304_MOESM18_ESM.pdf [file 12915_2016_304_MOESM18_ESM.pdf]

| Primary antibodies                      |                    |              |                      |                                                                                                                                      |                                |
|-----------------------------------------|--------------------|--------------|----------------------|--------------------------------------------------------------------------------------------------------------------------------------|--------------------------------|
| Name                                    | Abbreviation       | Host Species | Used dilution        | Donor and reference / vendor (catalog #, batch #, RRID #)                                                                            | Specificity                    |
| <i>D. melanogaster</i> Synapsin I       | $\alpha$ -Synapsin | Mouse        | 1/50                 | Dr. E. Buchner, University of Würzburg, Germany; Klagges et al., 1996 [245] (n/a, n/a, AB_2313617)                                   | Utz et al., 2008 [246]         |
| Moth Odorant receptor coreceptor        | $\alpha$ -Orco     | Rabbit       | 1/500                | Dr. J. Krieger, Martin-Luther-Universität Halle-Wittenberg, Germany                                                                  | RNAi Additional File 2 B and C |
| <i>Locusta migratoria</i> Tachykinin II | $\alpha$ -TKRP     | Rabbit       | 1/10000              | Dr. H. Agricola University of Jena, Germany; Veenstra et al., 1995 [247] / Jena Bioscience, Jena, Germany (ABD-045, n/a, AB_2341129) | Binzer et al., 2014 [103]      |
| Red fluorescent protein                 | $\alpha$ -DsRed    | Chicken      | 1/2000               | Rockland Immunochemicals INC, Limerick, PA, USA (600-901-379, 26274, AB_10704808)                                                    |                                |
| Red fluorescent protein                 | $\alpha$ -DsRed    | Rat          | 1/1000               | ChromoTek GmbH, Planegg-Martinsried, Germany (rfp-antibody-5f8, 090428, AB_2336064)                                                  |                                |
| Turbo Green fluorescent protein         | $\alpha$ -tGFP     | Rabbit       | 1/8000               | Evrogen, Moscow, Russia (AB514, n/a, n/a)                                                                                            |                                |
| Secondary antibodies                    |                    |              |                      |                                                                                                                                      |                                |
| Name                                    | Abbreviation       | Coupled dye  | Used dilution        | Donor/source, reference                                                                                                              |                                |
| goat anti-rabbit                        | GAR                | Cy3          | 1/300                | Jackson ImmunoResearch; Westgrove, PA, USA (111-165-144, n/a, AB_2338006)                                                            |                                |
| goat anti-chicken                       | GAC                | Cy3          | 1/300                | Jackson ImmunoResearch; Westgrove, PA, USA (103-165-155, 93117, AB_2337386)                                                          |                                |
| goat anti-rabbit                        | GAR                | Cy2          | 1/300                | Jackson ImmunoResearch; Westgrove, PA, USA (111-225-003, 88408, AB_2307385)                                                          |                                |
| goat anti-rabbit                        | GAR                | Cy5          | 1/300                | Jackson ImmunoResearch; Westgrove, PA, USA (111-175-144, 76449, AB_2338013)                                                          |                                |
| goat anti-mouse                         | GAM                | Cy5          | 1/300                | Jackson ImmunoResearch; Westgrove, PA, USA (115-175-146, 81431, AB_2338713)                                                          |                                |
| goat anti-chicken                       | GAC                | Alexa488     | 1/300                | Jackson ImmunoResearch; Westgrove, PA, USA (103-547-008, n/a, n/a)                                                                   |                                |
| goat anti-rat                           | GARat              | Cy5          | 1/300                | Jackson ImmunoResearch; Westgrove, PA, USA (112-175-143, 69074, AB_2338263)                                                          |                                |
| Dyes and tracers                        |                    |              |                      |                                                                                                                                      |                                |
| Name                                    | Abbreviation       | stains       | Dilution             | Donor / source / reference                                                                                                           |                                |
| 4',6-Diamidin-2-phenylindol             | DAPI               | nuclei       | 1/20000              | Sigma-Aldrich, Taufkirchen, Germany                                                                                                  |                                |
| Alexa Fluor 488 coupled phalloidin      | Phalloidin         | f-actin      | 1/200                | Molecular Probes, Eugene, OR, USA                                                                                                    |                                |
| Neurobiotin                             |                    | neurotracer  | 4% solution          | Vector Laboratories, Burlingame, UK                                                                                                  |                                |
| Texas-Red coupled 3000 MW dextran       |                    | neurotracer  | 50 mg/ml or crystals | Molecular Probes, Invitrogen, Karlsruhe, Germany                                                                                     |                                |
| Biotin coupled 3000 MW dextran          |                    | neurotracer  | crystals             | Molecular Probes, Invitrogen, Karlsruhe, Germany                                                                                     |                                |
| Cy3 coupled Streptavidin                |                    | biotin       | 1/200                | Dianova, Hamburg, Germany                                                                                                            |                                |

#### References:

245. Klagges BRE, Heimbeck G, Godenschwege TA, Hofbauer A, Pflugfelder GO, Reifegerste R, et al. Invertebrate Synapsins: A Single Gene Codes for Several Isoforms in *Drosophila*. *J. Neurosci.* 1996;16:3154–65.
246. Utz S, Huetteroth W, Vömel M, Schachtner J. Mas-allatotropin in the developing antennal lobe of the sphinx moth *Manduca sexta*: Distribution, time course, developmental regulation, and colocalization with other neuropeptides. *Dev. Neurobiol.* 2008;68:123–42.
247. Veenstra JA, Lau GW, Agricola HJ, Petzel DH. Immunohistological localization of regulatory peptides in the midgut of the female mosquito *Aedes aegypti*. *Histochem. Cell Biol.* 1995;104:337–47.
